# Supplementary material for: Capital flows and emerging market economies: a larger playing field?
Source: Oxford University Press journal article supplement (doi:10.1242/jeb.233221), 2007-01-01
Supplement: jeb233221supp.pdf [file jeb233221supp.pdf]

## Supplementary data

**Table S1. Primers used in this study**

| Primer    | Uses                     | Sequence (5' - 3')                                                                                                 | Annealing temperature (°C) | Expected size of PCR product (bp) |
|-----------|--------------------------|--------------------------------------------------------------------------------------------------------------------|----------------------------|-----------------------------------|
| SePGDS    | RT-qPCR                  | GAGAAGGATGAGGCTGTAAAGG<br>ACATGGCCGTTGTTCTTAGT                                                                     | 52                         | 110                               |
| SePGDH    | RT-qPCR                  | GCCATCCTGCTGGACATAAA<br>CCGCTACCTCCATTATCCTTTC                                                                     | 50                         | 287                               |
| SePGR     | RT-qPCR                  | GATCCCTACCAGCGAATGAAA<br>AGTGCAAGAGACACAGGTAAAT                                                                    | 52                         | 236                               |
| SePGES    | RT-qPCR                  | GAGTCCTGGTCAACACACTATC<br>CACTGTCACGTCGGCTAAA<br><u>TAATACGACTCACTATAGGGAGA</u>                                    | 52                         | 308                               |
| T7_SePGDH | RNAi                     | GCCATCCTGCTGGACATAAA<br><u>TAATACGACTCACTATAGGGAGA</u><br>CCGCTACCTCCATTATCCTTTC<br><u>TAATACGACTCACTATAGGGAGA</u> | 50                         | 333                               |
| T7_SePGR  | RNAi                     | GATCCCTACCAGCGAATGAAA<br><u>TAATACGACTCACTATAGGGAGA</u><br>AGTGCAAGAGACACAGGTAAAT<br>CCCCTAGTGTCTCATCACCTCCTCA     | 52                         | 282                               |
| dsCON     | RNAi                     | AAC<br>CCCAAGCTTCAGAGTCACCGTTGCAAG<br>TA                                                                           | 52                         | 520                               |
| RL32      | RT-PCR<br>and<br>RT-qPCR | ATGCCCAACATTGGTTACGG<br>TTCGTTCTCCTGGCTGCGGA                                                                       | 52                         | 270                               |

\* T7 promotor sequence is underlined.

**Table S2. GenBank accession number of different species used in phylogenetic analyses**

| Species                          | Acronym | GenBank accession number |
|----------------------------------|---------|--------------------------|
| <i>Plutella xylostella</i>       | PxPGDH  | XP_011559858.1           |
| <i>Helicoverpa armigera</i>      | HaPGDH  | XP_021193431.1           |
|                                  | HaPGR   | XP_021185469.1           |
| <i>Culex quinquefasciatus</i>    | CqPGDH  | XP_001867363.1           |
| <i>Musca domestica</i>           | MdPGDH  | XP_005190984.1           |
| <i>Trachymyrmex zeteki</i>       | TzPGDH  | KYQ48859.1               |
|                                  | TzPGR   | XP_018300833.1           |
| <i>Nylanderia fulva</i>          | NfPGDH  | XP_029174260.1           |
| <i>Tribolium castaneum</i>       | TcPGDH  | XP_015837535.1           |
| <i>Leptinotarsa decemlineata</i> | LdPGDH  | XP_023020854.1           |
| <i>Aethina tumida</i>            | AtPGDH  | XP_019866919.1           |
| <i>Homo sapiens</i>              | HsPGDH  | NP_000851.2              |
|                                  | HsPGR   | AAH35228.1               |
| <i>Mus musculus</i>              | MmPGDH  | AAB41825.1               |
| <i>Sus scrofa</i>                | SsPGDH  | NP_001177177.1           |
| <i>Bombyx mori</i>               | BmPGR   | XP_004932223.1           |
| <i>Agrilus planipennis</i>       | ApPGR   | XP_025829394.1           |
| <i>Anoplophora glabripennis</i>  | AgPGR   | XP_018575740.1           |
| <i>Sitophilus oryzae</i>         | SoPGR   | XP_030753535.1           |
| <i>Cyphomyrmex costatus</i>      | CcPGR   | XP_018394920.1           |
| <i>Acromyrmex echinator</i>      | AePGR   | XP_011055270.1           |
| <i>Aedes aegypti</i>             | AaPGR   | XP_021694721.1           |
| <i>Contarinia nasturtii</i>      | CnPGR   | XP_031627908.1           |
| <i>Pan paniscus</i>              | PpPGR   | XP_003810914.1           |
| <i>Macaca mulatta</i>            | MmPGR   | XP_014972591.1           |
